# Supplementary material for: Epitaxial Growth and Stoichiometry Control of Ultrawide Bandgap ZnGa2O4 Films by Pulsed Laser Deposition
Source: MDPI journal article supplement (doi:10.3390/coatings11070782), 2021-06-30
Supplement: s1 [file s1]

# Supplementary Materials: Epitaxial Growth and Stoichiometry Control of Ultrawide Bandgap $\text{ZnGa}_2\text{O}_4$ Films by Pulsed Laser Deposition

Liu Wang,<sup>1,2</sup> Wenrui Zhang<sup>2,\*</sup>, Ningtao Liu<sup>2</sup>, Tan Zhang<sup>2</sup>, Zilong Wang<sup>2</sup>, Simiao Wu<sup>2</sup> and Zhaolin Zhan,<sup>1,\*</sup> and Jichun Ye<sup>2,\*</sup>

<sup>1</sup> School of Material Science and Engineering, Kunming University of Science and Technology, Kunming 650093, Yunnan, China; wangliu@nimte.ac.cn

<sup>2</sup> Ningbo Institute of Material Technology and Engineering, Chinese Academy of Sciences, Ningbo 315201, Zhejiang, China; liuningtao@nimte.ac.cn (N.L.); zhangtan@nimte.ac.cn (T.Z.); wangzilong@nimte.ac.cn (Z.W.); wusimiao@nimte.ac.cn (S.W.)

\* Correspondence: zhangwenrui@nimte.ac.cn (W.Z), zl\_zhan@sohu.com (Z.Z.), jichun.ye@nimte.ac.cn (J.Y.)

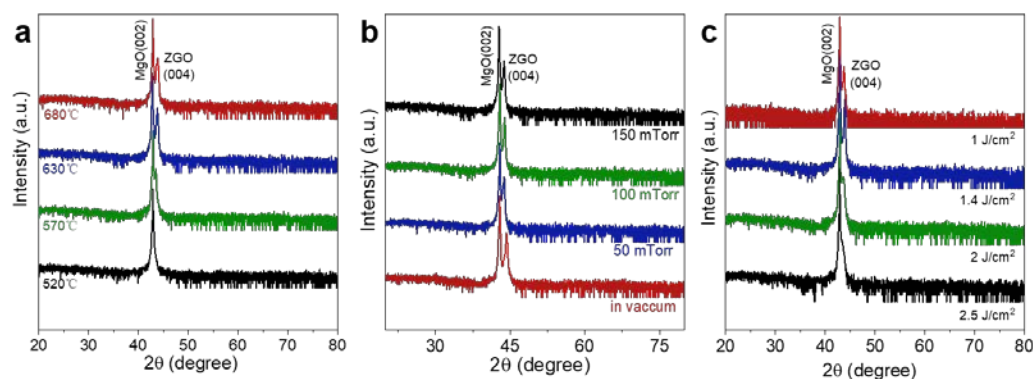

**Figure S1.**  $\theta$ - $2\theta$  XRD full scans of ZGO films over MgO showing c-axis-oriented growth which deposited under different conditions of (a) substrate temperature, (b) oxygen pressure and (c) laser fluence.

**Citation:** Liu W.; Wenrui Z.; Ningtao L.; Tan Z.; Zilong W.; Simiao W.; Zhaolin Z.; Jichun Y. Epitaxial Growth and Stoichiometry Control of Ultrawide Bandgap  $\text{ZnGa}_2\text{O}_4$  Films by Pulsed Laser Deposition. *Coatings* **2021**, *11*, 782. <https://doi.org/10.3390/782>

Received: 7 June 2021

Accepted: 28 June 2021

Published: 30 June 2021

**Publisher's Note:** MDPI stays neutral with regard to jurisdictional claims in published maps and institutional affiliations.

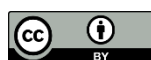

**Copyright:** © 2021 by the authors. Licensee MDPI, Basel, Switzerland. This article is an open access article distributed under the terms and conditions of the Creative Commons Attribution (CC BY) license (<http://creativecommons.org/licenses/by/4.0/>).

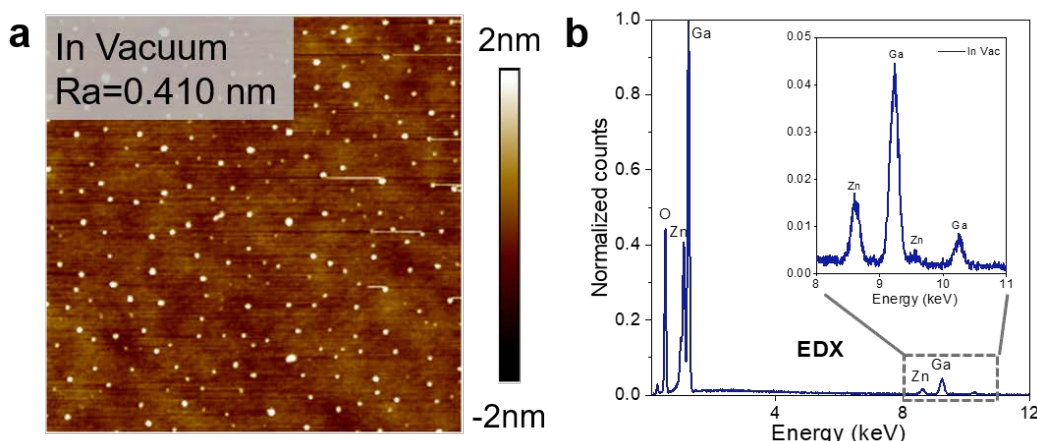

**Figure S2.** (a) Topology AFM image (scan area of  $2 \times 2 \mu\text{m}^2$ ) of the ZGO films deposited in vacuum ( $\sim 1 \times 10^{-6}$  Pa). (b) EDX spectra image of a Zn-deficient film deposited in vacuum showing  $\text{Zn}/\text{Ga} < 1/2$  due to Zn volatilization during the film growth.

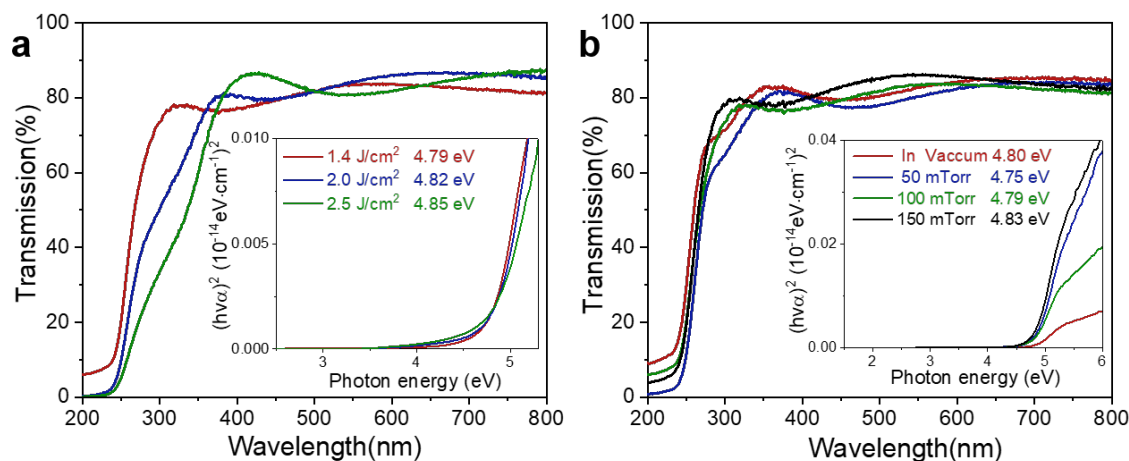

**Figure S3.** Thin film transmission as a function of excitation wavelength for ZGO films with (a) different laser fluence and (b) different oxygen pressure. Inset shows a linear extrapolation of  $E_g$  for ZGO films from their UV-Visible transmission spectra.
